# Supplementary material for: cis–trans Photoisomerization in [Ru(DIP)2(MeOH)2][OTf]2: synthesis, NMR, X-ray structure of the trans-isomer and photophysical properties
Source: Royal Society of Chemistry journal article supplement (doi:10.1039/b701089c), 2007-01-01
Supplement: b701089c.pdf [file b701089c.pdf]

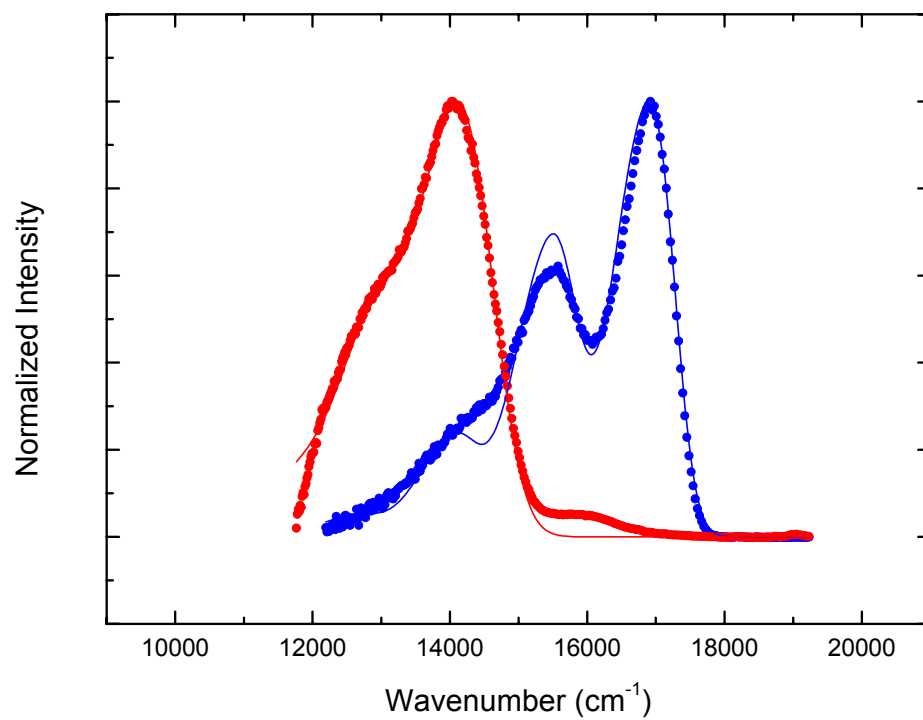

**Figure S.** Vibronic analysis of the luminescence profiles obtained at 77 K for the *cis*- (**1a**; blue) and *trans*-(**1b**; red) [Ru(DIP)<sub>2</sub>(MeOH)<sub>2</sub>][OTf]<sub>2</sub> complexes (experimental data, and fitted
